# Supplementary material for: Anticolorectal Cancer Activity of Bilobalide in Patient-Derived Colorectal Cancer Organoids and AOM/DSS Mouse Model
Source: Hindawi journal article supplement (doi:10.1155/2024/6698706), 2024-04-04
Supplement: f1 [file 6698706.f1.docx]

**Anti-colorectal Cancer Activity of Bilobalide in Patient-derived Colorectal Cancer Organoids and AOM/DSS Mouse Model**

*Heng zhang 1, Shuhua Fang 2, Faisal Raza3*, Nengqi Cao 1, Xingchao Fang 1, Xu Lu 1, Ran Li 4, Feng shi 5, Deqiang Wang 4, *, Min Xu 4, 6, **

1 Department of General Surgery, Nanjing Lishui District People’s Hospital, Zhongda Hospital Lishui Branch, Affiliated Hospital of Southeast University, Nanjing 211200, China.

2 Department of Pharmacy, Nanjing Lishui District People’s Hospital, Zhongda Hospital Lishui Branch, Affiliated Hospital of Southeast University, Nanjing 211200, China.

3 School of Pharmacy，Shanghai Jiao Tong University，No. 800, Dongchuan Road, 200240, Shanghai, China

4 College of Pharmacy, Jiangsu University, Zhenjiang 212001, China.

5 Institute of Digestive Diseases, Jiangsu University, Zhenjiang 212001, China.

6 Department of Gastroenterology, Affiliated Hospital of Jiangsu University, Zhenjiang 212001, China.

*** Correspondence:** Faisal Raza ([faisalraza@sjtu.edu.cn](mailto:faisalraza@sjtu.edu.cn) ); Deqiang Wang ([deqiang_wang@aliyun.com](mailto:deqiang_wang@aliyun.com)) and Min Xu ([peterxu1974@163.com](mailto:peterxu1974@163.com))

Supplementary Material

## Supplementary Figures


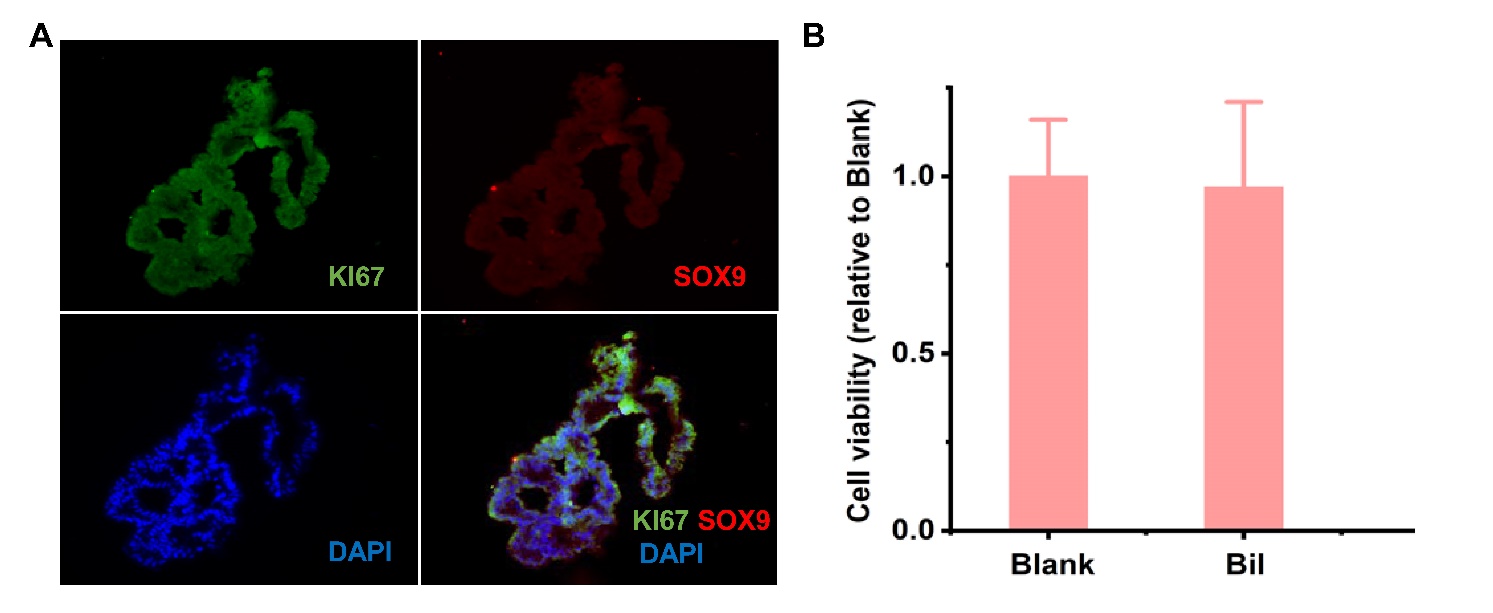
**Supplementary Figure 1.** **(A)** Characterization of CRC organoids by immunofluorescence stanning. **(B)** Relative cell viability of the bilobalide(Bil) group.
